# Supplementary material for: The Gene Ontology resource: enriching a GOld mine
Source: PubMed Central journal article supplement (PMC7779012; doi:10.1093/nar/gkaa1113), 2020-12-08
Supplement: gkaa1113_supplemental_file.pdf [file gkaa1113_supplemental_file.pdf]

# SUPPLEMENTARY

GENE ONTOLOGY  
Unifying Biology

About Ontology Annotations Downloads Help

COVID-19 pandemic: click here to get the latest GO data on SARS-CoV-2

Current release 2020-08-10: 44,262 GO terms | 8,047,076 annotations  
1,556,208 gene products | 4,643 species (see statistics)

## THE GENE ONTOLOGY RESOURCE

The mission of the GO Consortium is to develop a comprehensive, computational model of biological systems, ranging from the molecular to the organism level, across the multiplicity of species in the tree of life.

The Gene Ontology (GO) knowledgebase is the world's largest source of information on the functions of genes. This knowledge is both human-readable and machine-readable, and is a foundation for computational analysis of large-scale molecular biology and genetics experiments in biomedical research.

Search GO term or Gene Product in AmiGO ...

Any Ontology Gene Product

### GO Enrichment Analysis

Powered by PANTHER

Your gene IDs here...

biological process

Homo sapiens Examples Launch

Hint: can use UniProt ID/AC, Gene Name, Gene Symbols, MGI IDs

#### ONTOLOGY

The network of biological classes describing the current best representation of the "universe" of biology. The molecular functions, cellular locations, and processes gene products may carry out.

GO Ontology Overview  
Browse in AmiGO  
Download

#### ANNOTATION

Statements, based on specific, traceable scientific evidence, asserting that a specific gene product is a real exemplar of a particular GO class.

GO Annotations Overview  
Browse in AmiGO  
Download

#### GO-CAM

GO Causal Activity Model (GO-CAM) provides a structured framework to link standard GO annotations into a more complete model of a biological system.

GO-CAM Overview  
Browse GO-CAMs  
Download

#### TOOL & GUIDE

Tools to curate, browse, search, visualize and download both the ontology and annotations. Bioinformatic Guides (Notebooks) and simple API access to integrate GO into your research.

GO Tools Overview  
GO APIs Guide  
GO GitHub

Home Contact us Citation and Terms of Use

Copyright © 1999-2020 Member of the Open Biological Ontologies Foundry The Gene Ontology Consortium is supported by a P41 grant from the National Human Genome Research Institute (NIH/NIH) (grant #41 HD050273)

**Figure 1.** The new GO website emphasizes the three components of GO (ontology, standard GO annotations, GO-CAMs) and the tools provided by the consortium. Each card provides a quick access to the documentation (“Overview”), data (“Browse”) and downloads.
